# Supplementary material for: The Role of Drones in Out-of-Hospital Cardiac Arrest: A Scoping Review
Source: MDPI journal article supplement (doi:10.3390/jcm11195744), 2022-09-28
Supplement: s1 [file s1]

### Supplementary Material S3: Drone models and Specifications

| Author       | Year | Drone Model                                                                        | Specifications                                                                                                                                       |
|--------------|------|------------------------------------------------------------------------------------|------------------------------------------------------------------------------------------------------------------------------------------------------|
| Claesson     | 2016 | Two different eight-rotor class 2 UAVs from HEIGHT TECH GmbH & Co. KG company (DE) | Maximum velocity: 70 km/h<br>Maximum range: 10 km                                                                                                    |
| Pulver       | 2016 | From previous literature (Huston 2014)                                             | Maximum velocity: 100 km/h                                                                                                                           |
| Rachunok     | 2016 | Estimated                                                                          | -                                                                                                                                                    |
| Claesson     | 2017 | 8-rotor drone developed and certified by the Swedish Transportation Agency         | Maximum velocity: 75 km/h                                                                                                                            |
| Pulver       | 2018 | From previous literature (Communication 2014)                                      | Maximum velocity: 100 km/h                                                                                                                           |
| Bogle        | 2019 | Estimated                                                                          | Maximum velocity: 64.4 km/h<br>Maximum range: 19.3 km                                                                                                |
| Boutilier    | 2019 | Estimated                                                                          | Vertical acceleration: 9.81 m/s <sup>2</sup><br>Horizontal acceleration: 19.6 m/s <sup>2</sup><br>Maximum velocity: 100 km/h                         |
| Sanfridsson  | 2019 | Modified DJI Inspire 1                                                             | <u>Sparrow X1000</u><br>Maximum velocity: 80 km/h<br>Maximum range: 25 km<br><u>InDro M210C</u><br>Maximum velocity: 55 km/h<br>Maximum range: 25 km |
| Cheskes      | 2020 | Sparrow X1000 drone (Town of Caledon)                                              |                                                                                                                                                      |
|              |      | InDro M210C drone (County of Renfrew)                                              |                                                                                                                                                      |
| Glick        | 2020 | Multi-copter MD4-3000                                                              | Cruising speed: 72 km/h<br>Maximum range: 50 km                                                                                                      |
| Lancaster    | 2020 |                                                                                    | Maximum velocity: 100 km/h                                                                                                                           |
| Mackle       | 2020 | Drone developed by Delft University of Technology                                  | Maximum velocity: 100 km/h<br>Maximum range: 12 km                                                                                                   |
| Rosamond     | 2020 | DJI Matrice 600 Pro hexacopter                                                     | -                                                                                                                                                    |
| Sedig        | 2020 | Sparrow X1000 drone                                                                | Maximum velocity: 80 km/h<br>Maximum range: 25 km                                                                                                    |
| Starks       | 2020 | Unspecified                                                                        | -                                                                                                                                                    |
| Starks       | 2020 | -                                                                                  | -                                                                                                                                                    |
| Zegre Hemsey | 2020 | Unspecified                                                                        | -                                                                                                                                                    |
| Bauer        | 2020 | Estimated                                                                          | <u>Multirotor systems</u><br>Maximum velocity: 50 km/h<br><u>Tiltwing or tiltrotor systems</u><br>Maximum velocity: 100 km/h                         |

|            |      |                                                            |                                                                                                                              |
|------------|------|------------------------------------------------------------|------------------------------------------------------------------------------------------------------------------------------|
| Chu        | 2020 | From previous literature (Boutilier 2019)                  | Vertical acceleration: 9.81 m/s <sup>2</sup><br>Horizontal acceleration: 19.6 m/s <sup>2</sup><br>Maximum velocity: 100 km/h |
| Derkenne   | 2020 | Estimated                                                  | Cruising speed: 80 km/h                                                                                                      |
| Ryan       | 2021 | Eagle drone model by Flirtey                               | Maximum velocity: 48.3 km/h<br>Maximum range: 16.1 km                                                                        |
| Schierbeck | 2021 | DJI Matrice 600 Pro hexacopter                             | Maximum velocity: 60 km/h<br>Maximum range: 6 km                                                                             |
| Schierbeck | 2021 | DJI Matrice 600 Pro hexacopter                             | Maximum velocity: 60 km/h<br>Maximum range: 6 km                                                                             |
| Choi       | 2021 | Huesin Blueye 1 k model (Huins Inc.)                       | Maximum velocity: 50 km/h                                                                                                    |
| Rees       | 2021 | Penguin B fixed wing drone                                 | Indicated velocity: 90 km/h<br>Maximum range: 80.5 km                                                                        |
| Baumgarten | 2021 | Octocopter with operating system (type “Ceptor”, GlobeUAV) | Maximum velocity: 60 km/h                                                                                                    |
