# Supplementary material for: The Role of Drones in Out-of-Hospital Cardiac Arrest: A Scoping Review
Source: J Clin Med. 2022 Sep 28;11(19):5744. doi: 10.3390/jcm11195744 (PMC9572186; doi:10.3390/jcm11195744)
Supplement: Supplementary file 1 [file jcm-11-05744-s001.zip]

Archive with 4 entries (4 files):
- SupplementaryMaterialS1_SearchStrategy.pdf
- SupplementaryMaterialS2_PRISMA2020FlowDiagram.pdf
- SupplementaryMaterialS3_DroneModelsandSpecifications.pdf
- SupplementaryMaterialS4_PRISMAChecklist.pdf
